# Supplementary material
Source: PubMed Central journal article supplement (PMC4516571)

**SUPPLEMENT TO MANUSCRIPT:**

**Antidepressant Therapy in Functional Dyspepsia:  
A Multi-Center, Randomized, Controlled Study**

**Supplement Table 1. Adverse Events, n=292**

| AE Type                         | Total<br>(n=292) | Placebo<br>(n=97) | Amitriptyline<br>(n=97) | Escitalopram<br>(n=98) | P-value <sup>§</sup> |
|---------------------------------|------------------|-------------------|-------------------------|------------------------|----------------------|
| <b>Cardiac</b>                  | 4 (1.4%)         | 2 (2.1%)          | 0 (0%)                  | 2 (2.0%)               | 0.55                 |
| <b>Dermatologic</b>             | 11 (3.8%)        | 8 (8.2%)          | 0 (0%)                  | 3 (3.1%)               | <b>0.007</b>         |
| <b>Endocrine</b>                | 8 (2.7%)         | 1 (1.0%)          | 2 (2.1%)                | 5 (5.1%)               | 0.29                 |
| <b>Hematologic</b>              | 1 (0.3%)         | 1 (1.0%)          | 0 (0%)                  | 0 (0%)                 | 0.66                 |
| Abdominal pain                  | 11 (3.8%)        | 1 (1.0%)          | 5 (5.2%)                | 5 (5.1%)               | 0.24                 |
| Black stools                    | 1 (0.3%)         | 0 (0%)            | 1 (1.0%)                | 0 (0%)                 | 0.66                 |
| Bloating                        | 3 (1.0%)         | 1 (1.0%)          | 1 (1.0%)                | 1 (1.0%)               | 1.00                 |
| <i>C. difficile</i> infection   | 1 (0.3%)         | 0 (0%)            | 1 (1.0%)                | 0 (0%)                 | 0.66                 |
| Change in appetite              | 2 (0.7%)         | 0 (0%)            | 0 (0%)                  | 2 (2.0%)               | 0.33                 |
| Constipation                    | 8 (2.7%)         | 1 (1.0%)          | 5 (5.2%)                | 2 (2.0%)               | 0.23                 |
| Diarrhea                        | 4 (1.4%)         | 1 (1.0%)          | 2 (2.1%)                | 1 (1.0%)               | 0.85                 |
| Dry Mouth                       | 2 (0.7%)         | 0 (0%)            | 2 (2.1%)                | 0 (0%)                 | 0.22                 |
| Heartburn                       | 2 (0.7%)         | 1 (1.0%)          | 1 (1.0%)                | 0 (0%)                 | 0.55                 |
| Hemorrhoids                     | 1 (0.3%)         | 1 (1.0%)          | 0 (0%)                  | 0 (0%)                 | 0.66                 |
| Intestinal fluid                | 2 (0.7%)         | 2 (2.1%)          | 0 (0%)                  | 0 (0%)                 | 0.22                 |
| Liver function abnormality      | 2 (0.7%)         | 0 (0%)            | 1 (1.0%)                | 1 (1.0%)               | 1.00                 |
| Nausea/Vomiting                 | 18 (6.2%)        | 3 (3.1%)          | 6 (6.2%)                | 9 (9.2%)               | 0.22                 |
| <b>Gastrointestinal</b>         | 57 (19.5%)       | 11 (11.3%)        | 25 (25.8%)              | 21 (21.4%)             | <b>0.03</b>          |
| <b>Gynecologic</b>              | 2 (0.7%)         | 0 (0%)            | 2 (2.1%)                | 0 (0%)                 | 0.22                 |
| <b>Metabolic/Nutritional</b>    | 4 (1.4%)         | 3 (3.1%)          | 0 (0%)                  | 1 (1.0%)               | 0.23                 |
| <b>Musculoskeletal/Skeletal</b> | 21 (7.2%)        | 4 (4.1%)          | 10 (10.3%)              | 7 (7.1%)               | 0.23                 |
| Anxiety                         | 12 (4.1%)        | 4 (4.1%)          | 2 (2.1%)                | 6 (6.1%)               | 0.41                 |
| Depression                      | 1 (0.3%)         | 1 (1.0%)          | 0 (0%)                  | 0 (0%)                 | 0.66                 |
| Dizziness                       | 17 (5.8%)        | 1 (1.0%)          | 5 (5.2%)                | 11 (11.2%)             | <b>0.009</b>         |
| Dream abnormalities             | 1 (0.3%)         | 0 (0%)            | 1 (1.0%)                | 0 (0%)                 | 0.66                 |
| Drowsiness or Somnolence        | 29 (9.9%)        | 5 (5.2%)          | 14 (14.4%)              | 10 (10.2%)             | 0.09                 |
| Headache                        | 13 (4.4%)        | 3 (3.1%)          | 2 (2.1%)                | 8 (8.2%)               | 0.16                 |
| Insomnia                        | 8 (2.7%)         | 1 (1.0%)          | 2 (2.1%)                | 5 (5.1%)               | 0.29                 |
| Tingling                        | 3 (1.0%)         | 1 (1.0%)          | 1 (1.0%)                | 1 (1.0%)               | 1.00                 |
| <b>Neurologic</b>               | 84 (28.8%)       | 16 (16.5%)        | 27 (27.8%)              | 41 (41.8%)             | <b>0.0005</b>        |
| <b>Otolaryngologic</b>          | 6 (2.0%)         | 1 (1.0%)          | 3 (3.1%)                | 2 (2.0%)               | 0.70                 |

## Antidepressant Therapy in Functional Dyspepsia

|                        |          |          |          |          |             |
|------------------------|----------|----------|----------|----------|-------------|
| <b>Pulmonary</b>       | 9 (3.1%) | 1 (1.0%) | 6 (6.2%) | 2 (2.0%) | 0.13        |
| <b>Psychiatric</b>     | 1 (0.3%) | 1 (1.0%) | 0 (0%)   | 0 (0%)   | 0.66        |
| <b>Respiratory</b>     | 5 (1.7%) | 2 (2.1%) | 2 (2.1%) | 1 (1.0%) | 0.75        |
| <b>Sensory Systems</b> | 4 (1.4%) | 1 (1.0%) | 2 (2.1%) | 1 (1.0%) | 0.85        |
| <b>Urogenital</b>      | 4 (1.4%) | 0 (0%)   | 4 (4.1%) | 0 (0%)   | <b>0.02</b> |

§ Based on Fisher's Exact test

### Supplement Figure Legends

**Supplement Figure 1.** Gastric emptying before and after treatment (median, interquartile ranges).

There were no differences in baseline solid-phase gastric emptying— $t_{1/2}$  in minutes—between treatment arms. There were also no changes in gastric emptying after treatment in all three treatment arms.

**Supplement Figure 2.** Nutrient drink test satiety test before and after treatment (median interquartile ranges).

The Nutrient Drink Test (NDT) for gastric satiety showed that there were no differences in baseline meal-induced satiety—as measured by maximum tolerated volume (MTV) of Ensure—between treatment arms. There were no changes in gastric satiety after treatment in all three treatment arms.

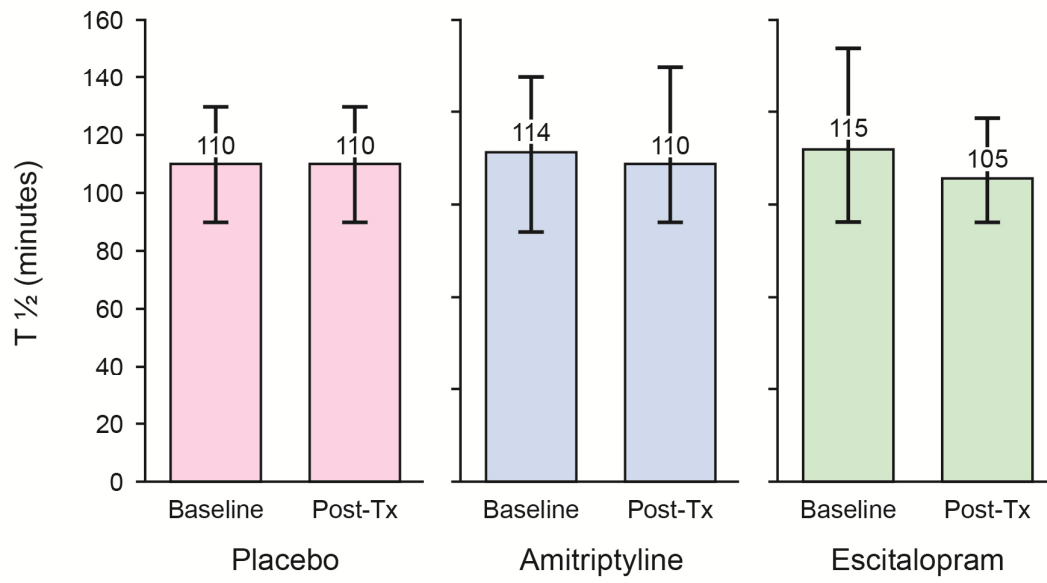

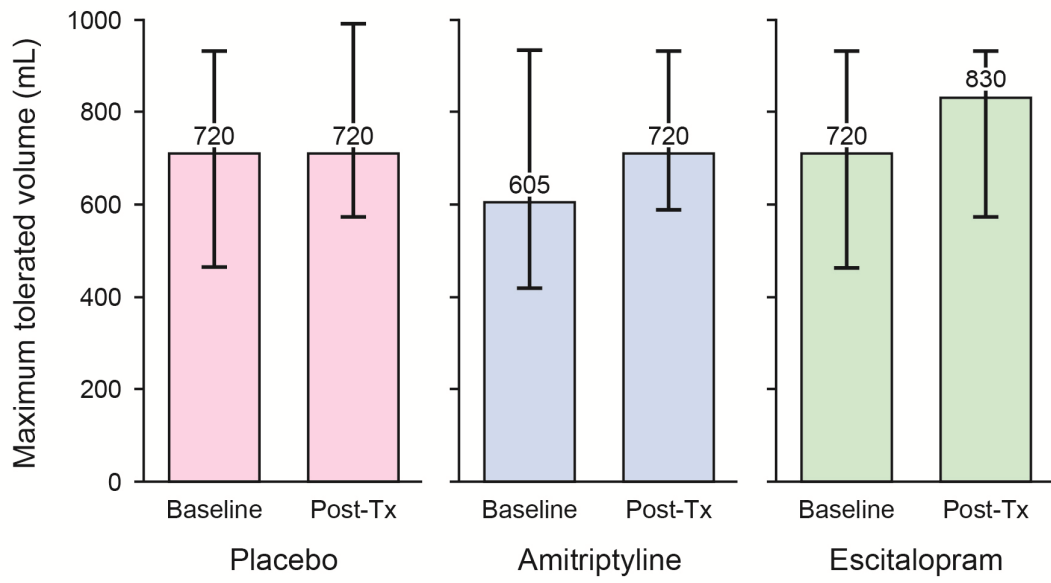

Supplement: NIHMS684856-supplement-01.pdf [file NIHMS684856-supplement-01.pdf]
